# Supplementary material for: Clinical Usefulness of Different Lipid Measures for Prediction of Coronary Heart Disease in Type 2 Diabetes: A report from the Swedish National Diabetes Register
Source: PubMed Central journal article supplement — Diabetes Care. 2011 Aug 19;34(9):2095–100. doi: 10.2337/dc11-0209 (PMC3161275; doi:10.2337/dc11-0209), 2011-08-19
Supplement: supp_dc11-0209v110209_DC110209SupplementaryData.pdf [file supp_dc11-0209v110209_DC110209SupplementaryData.pdf]

SUPPLEMENTARY DATA

**Supplementary Table 1. Baseline characteristics in patients with type 2 diabetes, with or without lipid lowering drugs.**

|                                   | No lipid lowering drugs | drugs     | P value |
|-----------------------------------|-------------------------|-----------|---------|
| Numbers                           | 10,627                  | 7,704     |         |
| <b>Lipid measures</b>             |                         |           |         |
| Total cholesterol (TC), mmol/L    | 5.20±0.94               | 4.85±1.01 | <0.001  |
| Non-HDL cholesterol, mmol/L       | 3.89±0.95               | 3.57±0.99 | <0.001  |
| LDL cholesterol, mmol/L           | 3.15±0.86               | 2.76±0.92 | <0.001  |
| HDL cholesterol, mmol/L           | 1.32±0.42               | 1.28±0.40 | <0.001  |
| Triacylglycerol (TG), mmol/L      | 1.63±0.76               | 1.81±0.79 | <0.001  |
| Ratio TC:HDL                      | 4.25±1.28               | 4.03±1.22 | <0.001  |
| Ratio Non-HDL:HDL                 | 3.25±1.28               | 3.03±1.22 | <0.001  |
| Ratio LDL:HDL                     | 2.61±1.02               | 2.32±0.98 | <0.001  |
| Ratio TG:HDL                      | 1.41±0.90               | 1.59±0.94 | <0.001  |
| <b>Clinical features</b>          |                         |           |         |
| Age, years                        | 59±8                    | 61±7      | <0.001  |
| Diabetes duration, years          | 7±6                     | 8±6       | <0.001  |
| HbA1c, %                          | 7.2±1.2                 | 7.3±1.2   | <0.001  |
| Systolic blood pressure, mmHg     | 140±18                  | 141±17    | <0.001  |
| BMI, kg/m <sup>2</sup>            | 29.5±5.3                | 29.7±4.8  | 0.003   |
| Male gender                       | 60.6                    | 60.2      | n.s.    |
| Smoking                           | 19.1                    | 18.5      | n.s.    |
| Albuminuria >20 µg/min            | 17.3                    | 23.1      | <0.001  |
| History of cardiovascular disease | 6.1                     | 23.3      | <0.001  |
| <b>Hypoglycaemic treatment</b>    |                         |           |         |
| Diet only                         | 26.7                    | 17.8      | <0.001  |
| Oral agents only                  | 38.0                    | 39.4      | n.s.    |
| Oral agents and insulin           | 14.1                    | 22.9      | <0.001  |
| Insulin only                      | 21.2                    | 19.9      | 0.04    |

Means ± SD and frequencies (%) are given.

SUPPLEMENTARY DATA

**Supplementary Table 2. Hazard ratios for different lipid measures and fatal/nonfatal coronary heart disease at Cox regression, in 10,627 type 2 diabetic patients with no lipid lowering drugs and 578 CHD events, and 7,704 patients with lipid lowering drugs and 561 events, followed for five years.**

|                | No lipid lowering drugs    |               |            | Lipid lowering drugs       |               |            |
|----------------|----------------------------|---------------|------------|----------------------------|---------------|------------|
|                | Hazard ratio *<br>(95% CI) | Wald<br>$X^2$ | P<br>value | Hazard ratio *<br>(95% CI) | Wald<br>$X^2$ | P<br>value |
| Lipid measures |                            |               |            |                            |               |            |
| TC:HDL         | 1.27 (1.17-1.37)           | 35            | <0.001     | 1.19 (1.09-1.28)           | 17            | <0.001     |
| Non-HDL:HDL    | 1.27 (1.17-1.37)           | 35            | <0.001     | 1.19 (1.09-1.28)           | 17            | <0.001     |
| LDL:HDL        | 1.25 (1.16-1.35)           | 32            | <0.001     | 1.18 (1.09-1.27)           | 17            | <0.001     |
| Non-HDL        | 1.22 (1.13-1.33)           | 23            | <0.001     | 1.18 (1.09-1.28)           | 16            | <0.001     |
| TG:HDL         | 1.18 (1.09-1.27)           | 17            | <0.001     | 1.10 (1.01-1.19)           | 5.1           | 0.02       |
| LDL            | 1.18 (1.09-1.28)           | 16            | <0.001     | 1.16 (1.07-1.26)           | 13            | <0.001     |
| TC             | 1.15 (1.06-1.25)           | 12            | <0.001     | 1.13 (1.04-1.23)           | 8.6           | <0.001     |
| HDL            | 0.84 (0.76-0.93)           | 11            | <0.001     | 0.87 (0.79-0.96)           | 7.4           | 0.006      |
| TG             | 1.14 (1.05-1.24)           | 10            | 0.002      | 1.09 (0.99-1.18)           | 3.7           | 0.55       |
| Combinations:  |                            |               |            |                            |               |            |
| LDL            | 1.18 (1.09-1.28)           | 15            | <0.001     | 1.16 (1.07-1.26)           | 13            | <0.001     |
| TG:HDL         | 1.18 (1.09-1.27)           | 16            | <0.001     | 1.10 (1.02-1.20)           | 5.5           | 0.02       |

Abbreviations: TC: total cholesterol; HDL: high-density lipoprotein cholesterol; LDL: low-density lipoprotein cholesterol; TG: triacylglycerol; CI: confidence interval.

\* Cox proportional hazards regression for a 1 SD increase in a lipid measure, with adjustment for age, sex, diabetes duration, type of hypoglycaemic treatment, HbA1c, systolic blood pressure, smoking, BMI, albuminuria >20 µg/min and a history of CVD. Wald  $X^2$  statistics (a higher value indicates stronger association) and P values are given.

SUPPLEMENTARY DATA

**Supplementary Table 3. Comparison of triacylglycerol and HDL-cholesterol by various subgroups of lipid measures.**

|                                               | Tertile 1 of lipid measures |                    |                            |                            | P for trend |
|-----------------------------------------------|-----------------------------|--------------------|----------------------------|----------------------------|-------------|
|                                               | Non-HDL:HDL                 | LDL:HDL            | Non-HDL                    | LDL                        |             |
|                                               | <2.5<br>(n = 6,180)         | <2.0<br>(n=6,225)  | <3.3 mmol/L<br>(n = 6,079) | <2.5 mmol/L<br>(n = 6,224) |             |
| <b>TG:HDL</b>                                 |                             |                    |                            |                            |             |
| Mean (SD)                                     | 0.82±0.47                   | 1.04±0.75          | 1.15±0.81                  | 1.49±1.03                  | <0.001      |
| Median (25 <sup>th</sup> – 75 <sup>th</sup> ) | 0.72 (0.50 – 1.0)           | 0.81 (0.50 – 1.31) | 0.92 (0.57 – 1.47)         | 1.21 (0.71 – 2.0)          |             |
| <b>TG, mmol/L</b>                             |                             |                    |                            |                            |             |
| Mean (SD)                                     | 1.25±0.58                   | 1.46±0.76          | 1.37±0.67                  | 1.69±0.83                  | <0.001      |
| Median (25 <sup>th</sup> – 75 <sup>th</sup> ) | 1.10 (0.80 – 1.50)          | 1.30 (0.90 – 1.90) | 1.20 (0.90 – 1.70)         | 1.50 (1.0 – 2.20)          |             |
| <b>HDL, mmol/L</b>                            |                             |                    |                            |                            |             |
| Mean (SD)                                     | 1.66±0.45                   | 1.62±0.48          | 1.41±0.52                  | 1.35±0.51                  | <0.001      |
| Median (25 <sup>th</sup> – 75 <sup>th</sup> ) | 1.60 (1.40 – 1.90)          | 1.54 (1.30 – 1.89) | 1.30 (1.07 – 1.69)         | 1.20 (1.0 – 1.58)          |             |

Abbreviations: TG: triacylglycerol. HDL: high-density lipoprotein cholesterol. TG:HDL: ratio of triacylglycerol-to-HDL-cholesterol. P for trend by GLM regression.
